# Supplementary material
Source: PubMed Central journal article supplement (PMC4424401)
Supplement: supp_M114.043166_mcp.M114.043166-1.pdf [file supp_M114.043166_mcp.M114.043166-1.pdf]

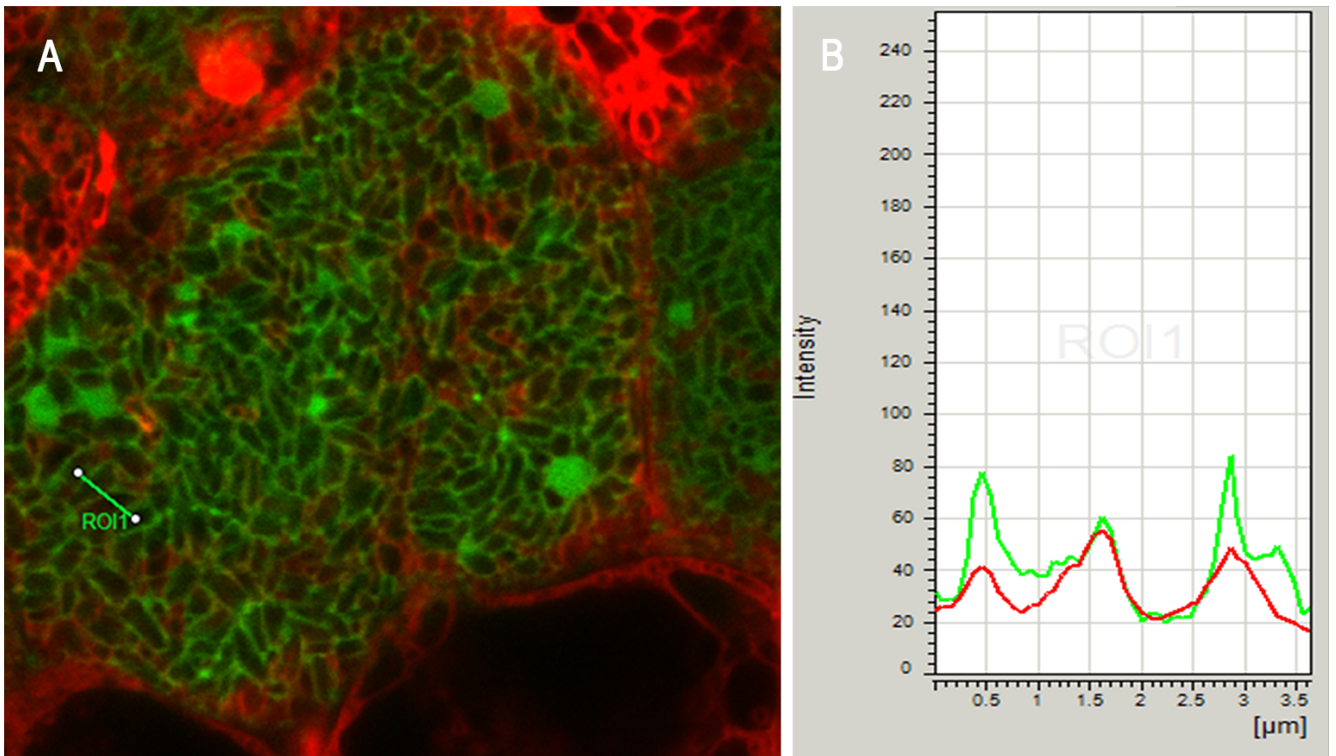

**Supp. Fig. 1. Analysis of fluorescence intensity in region of interest.**

(A) Confocal image of expressing GFP- GmNPF5.25 (Glyma34600.1) nodule cells (from Fig. 3D). SM is counterstained with FM4-64. (B) Overlapping GFP and FM4-64 signal in region of interest 1 (ROI1). Scale bars represent 20  $\mu\text{m}$  (A).
